# Supplementary material for: Genomic Insights of Halophilic Planococcus maritimus SAMP MCC 3013 and Detail Investigation of Its Biosurfactant Production
Source: PubMed Central journal article supplement (PMC6399143; doi:10.3389/fmicb.2019.00235), 2019-02-26
Supplement: Image_1.pdf [file Image_1.pdf]

# KEGG Distribution

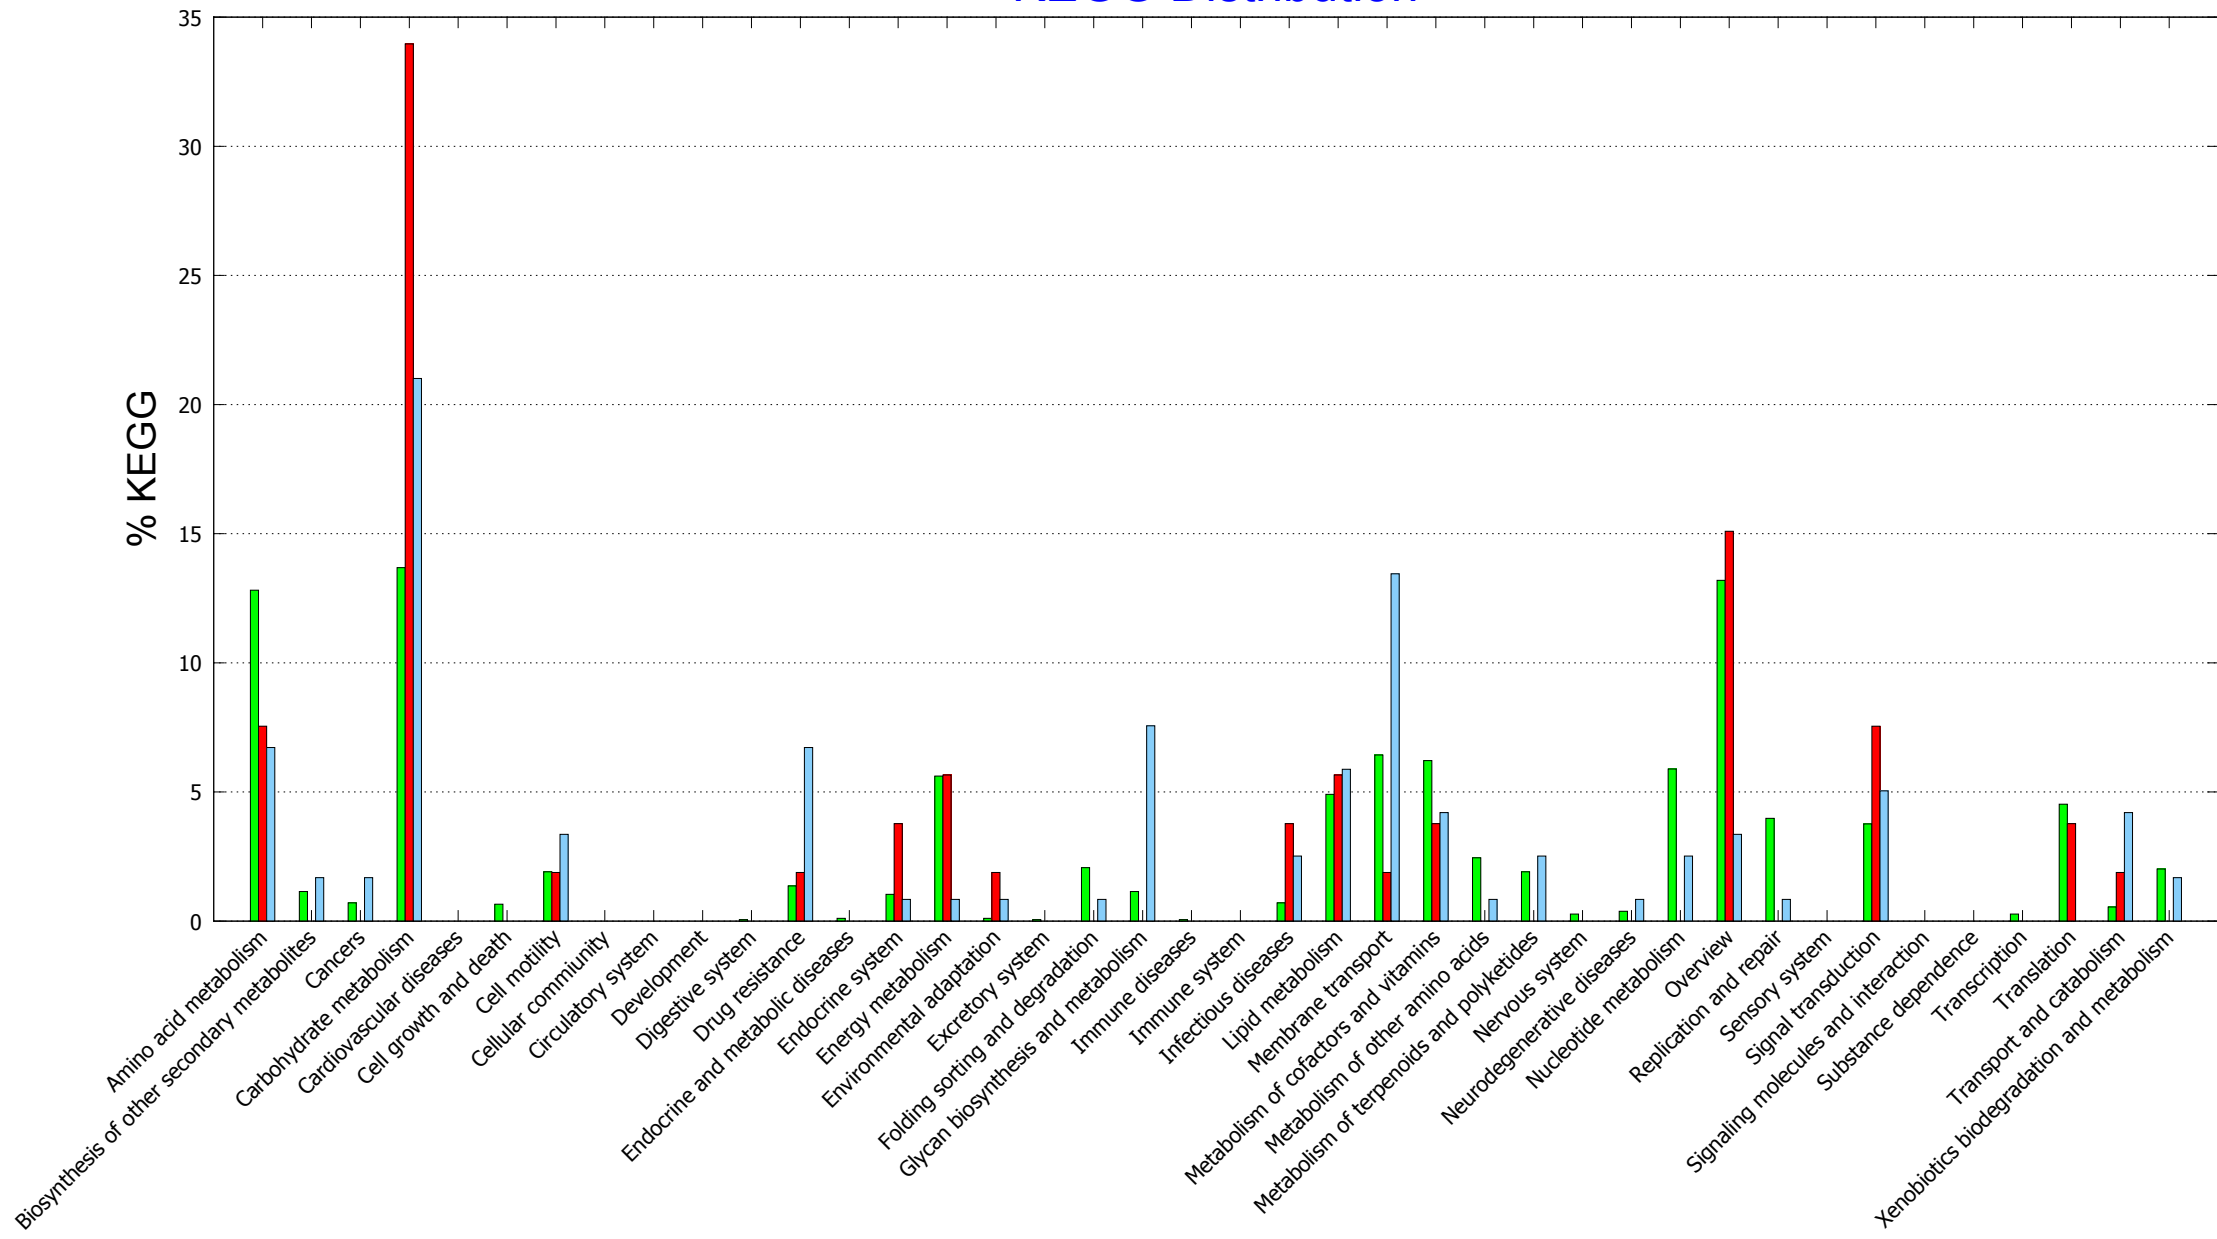

CORE █  
ACCESSORY █  
UNIQUE █
